# Supplementary material
Source: PubMed Central journal article supplement (PMC307674)
Supplement: pnas_100_26_15953__1.pdf [file pnas_100_26_15953__1.pdf]

**Table 2. List of genes constitutively expressed in the CNS and heart of steroid-treated and untreated *Borrelia burgdorferi*-infected non-human primates (NHPs)**

|        | Genetic element* | Paralogous family* | Functional group* | Gene description*                                                                         | Dexa-treated medulla† | Dexa-treated heart† | Competent medulla‡ | Competent heart‡ |
|--------|------------------|--------------------|-------------------|-------------------------------------------------------------------------------------------|-----------------------|---------------------|--------------------|------------------|
| BB0006 | Chromosome       | None               | HX                | BB0006 conserved hypothetical integral membrane protein { <i>Haemophilus influenzae</i> } | 3                     | 3                   | 0.5                | 0.5              |
| BB0014 | Chromosome       | None               | R                 | BB0014 primosomal protein N' (priA) { <i>Borrelia burgdorferi</i> }                       | 2                     | 2                   | 2                  | 2                |
| BB0026 | Chromosome       | None               | B                 | BB0026 methylenetetrahydrofolate dehydrogenase (folD) { <i>Bacillus subtilis</i> }        | 1                     | 1                   | 0.5                | 0.5              |
| BB003  | Chromosome       | PF31               | R                 | BB0035 DNA topoisomerase IV (parC) { <i>Borrelia burgdorferi</i> }                        | 1                     | 1                   | 0.5                | 0.5              |
| BB0169 | Chromosome       | None               | TF                | BB0169 translation initiation factor 1 (infA) { <i>Escherichia coli</i> }                 | 2                     | 2                   | 2                  | 2                |
| BB0291 | Chromosome       | None               | F                 | BB0291 flagellar basal-body rod protein (fliF) { <i>Borrelia burgdorferi</i> }            | 3                     | 3                   | 3                  | 3                |
| BB0299 | Chromosome       | None               | D                 | BB0299 cell division protein (ftsZ) { <i>Bacillus subtilis</i> }                          | 3                     | 3                   | 3                  | 3                |
| BB0301 | Chromosome       | None               | D                 | BB0301 cell division protein (divIB) { <i>Borrelia burgdorferi</i> }                      | 2                     | 2                   | 2                  | 2                |
| BB0305 | Chromosome       | None               | U                 | BB0305 hypothetical protein                                                               | 1                     | 1                   | 0.5                | 0.5              |
| BB0309 | Chromosome       | None               | HX                | BB0309 hypothetical protein                                                               | 1                     | 1                   | 1                  | 1                |
| BB0316 | Chromosome       | PF129              | HX                | BB0316 conserved hypothetical integral membrane protein { <i>Mycoplasma genitalium</i> }  | 1                     | 1                   | 0.5                | 0.5              |
| BB0320 | Chromosome       | None               | U                 | BB0320 hypothetical protein                                                               | 1                     | 1                   | 0.5                | 0.5              |
| BB0321 | Chromosome       | None               | U                 | BB0321 hypothetical protein                                                               | 1                     | 1                   | 0.5                | 0.5              |
| BB0360 | Chromosome       | None               | U                 | BB0360 hypothetical protein                                                               | 1                     | 1                   | 1                  | 1                |
| BB0363 | Chromosome       | None               | X                 | BB0363 periplasmic protein { <i>Borrelia burgdorferi</i> }                                | 2                     | 2                   | 3                  | 3                |
| BB0365 | Chromosome       | None               | HX                | BB0365 lipoprotein LA7 { <i>Borrelia burgdorferi</i> }                                    | 3                     | 3                   | 1                  | 1                |
| BB0368 | Chromosome       | None               | FM                | BB0368 glycerol-3-phosphate dehydrogenase, NAD(P)+ (gpsA) { <i>Bacillus subtilis</i> }    | 3                     | 3                   | 2                  | 2                |
| BB0383 | Chromosome       | PF36               | CE                | BB0383 basic membrane protein A (bmpA) { <i>Borrelia burgdorferi</i> }                    | 1                     | 1                   | 1                  | 1                |
| BB0389 | Chromosome       | None               | TR                | BB0389 DNA-directed RNA polymerase (rpoB) { <i>Borrelia burgdorferi</i> }                 | 3                     | 3                   | 3                  | 3                |
| BB0390 | Chromosome       | None               | RP                | BB0390 ribosomal protein L7/L12 (rpL) { <i>Salmonella choleraesuis</i> }                  | 3                     | 3                   | 0.5                | 0.5              |
| BB0394 | Chromosome       | None               | TR                | BB0394 transcription antitermination factor (nusG) { <i>Escherichia coli</i> }            | 3                     | 3                   | 3                  | 3                |
| BB0396 | Chromosome       | None               | RP                | BB0396 ribosomal protein L33 (rpmG) { <i>Bacillus stearothermophilus</i> }                | 3                     | 3                   | 3                  | 3                |
| BB0404 | Chromosome       | None               | U                 | BB0404 hypothetical protein                                                               | 3                     | 3                   | 2                  | 2                |
| BB0435 | Chromosome       | PF31               | R                 | BB0435 DNA gyrase, subunit A (gyrA) { <i>Bacillus subtilis</i> }                          | 2                     | 2                   | 2                  | 2                |
| BB0436 | Chromosome       | PF30               | R                 | BB0436 DNA gyrase, subunit B (gyrB) { <i>Borrelia burgdorferi</i> }                       | 3                     | 3                   | 0.5                | 0.5              |
| BB0446 | Chromosome       | None               | ARS               | BB0446 aspartyl-tRNA synthetase (aspS) { <i>Escherichia coli</i> }                        | 0.5                   | 0.5                 | 0.5                | 0.5              |
| BB0493 | Chromosome       | None               | RP                | BB0493 ribosomal protein L6 (rpL6) { <i>Streptomyces coelicolor</i> }                     | 3                     | 3                   | 3                  | 3                |
| BB0498 | Chromosome       | None               | PE                | BB0498 preprotein translocase subunit (secY) { <i>Staphylococcus carnosus</i> }           | 1                     | 1                   | 1                  | 1                |
| BB0518 | Chromosome       | PF9                | HS                | BB0518 heat shock protein 70 (dnaK-2) { <i>Borrelia burgdorferi</i> }                     | 3                     | 3                   | 2                  | 2                |
| BB0596 | Chromosome       | PF13               | CH                | BB0596 methyl-accepting chemotaxis protein (mcp-2) { <i>Treponema denticola</i> }         | 3                     | 3                   | 1                  | 1                |
| BB0597 | Chromosome       | PF13               | CH                | BB0597 methyl-accepting chemotaxis protein (mcp-3) { <i>Treponema denticola</i> }         | 1                     | 1                   | 1                  | 1                |
| BB0601 | Chromosome       | None               | B                 | BB0601 serine hydroxymethyltransferase (glyA) { <i>Escherichia coli</i> }                 | 1                     | 1                   | 1                  | 1                |
| BB0608 | Chromosome       | None               | PD                | BB0608 aminoacyl-histidine dipeptidase (pepD) { <i>Haemophilus influenzae</i> }           | 2                     | 2                   | 2                  | 2                |
| BB0613 | Chromosome       | PF22               | PD                | BB0613 ATP-dependent protease LA (lon-2) { <i>Haemophilus influenzae</i> }                | 3                     | 3                   | 3                  | 3                |
| BB0614 | Chromosome       | None               | U                 | BB0614 hypothetical protein                                                               | 2                     | 2                   | 1                  | 1                |

|        | Genetic element* | Paralogous family* | Functional group* | Gene description*                                                                           | Dexa-treated medulla† | Dexa-treated heart† | Competent medulla‡ | Competent heart‡ |
|--------|------------------|--------------------|-------------------|---------------------------------------------------------------------------------------------|-----------------------|---------------------|--------------------|------------------|
| BB0617 | Chromosome       | None               | U                 | BB0617 hypothetical protein                                                                 | 3                     | 3                   | 1                  | 1                |
| BB0618 | Chromosome       | None               | NM                | BB0618 cytidine deaminase (cdd) {Mycoplasma pneumoniae}                                     | 1                     | 1                   | 1                  | 1                |
| BB0619 | Chromosome       | None               | HX                | BB0619 conserved hypothetical protein {Mycoplasma pneumoniae}                               | 1                     | 1                   | 1                  | 1                |
| BB0623 | Chromosome       | PF20               | R                 | BB0623 transcription-repair coupling factor (mfd) {Haemophilus influenzae}                  | 2                     | 2                   | 2                  | 2                |
| BB0630 | Chromosome       | None               | IM                | BB0630 1-phosphofructokinase (fruK) {Haemophilus influenzae}                                | 1                     | 1                   | 0.5                | 0.5              |
| BB0632 | Chromosome       | None               | R                 | BB0632 exodeoxyribonuclease V, alpha chain (recD) {Escherichia coli}                        | 1                     | 1                   | 1                  | 1                |
| BB0633 | Chromosome       | None               | R                 | BB0633 exodeoxyribonuclease V, beta chain (recB) {Haemophilus influenzae}                   | 2                     | 2                   | 2                  | 2                |
| BB0637 | Chromosome       | PF135              | TP                | BB0637 Na <sup>+</sup> /H <sup>+</sup> antiporter (nhaC-1) {Bacillus firmus}                | 1                     | 1                   | 0.5                | 0.5              |
| BB0641 | Chromosome       | PF41               | TP                | BB0641 spermidine/putrescine ABC transporter, permease protein (potB) {Escherichia coli}    | 1                     | 1                   | 1                  | 1                |
| BB0642 | Chromosome       | PF4                | TP                | BB0642 spermidine/putrescine ABC transporter, ATP-binding protein (potA) {Escherichia coli} | 1                     | 1                   | 1                  | 1                |
| BB0646 | Chromosome       | None               | U                 | BB0646 hypothetical protein                                                                 | 1                     | 1                   | 1                  | 1                |
| BB0654 | Chromosome       | None               | U                 | BB0654 hypothetical protein                                                                 | 2                     | 2                   | 2                  | 2                |
| BB0655 | Chromosome       | PF15               | HS                | BB0655 heat shock protein (dnaJ-2) {Clostridium acetobutylicum}                             | 2                     | 2                   | 2                  | 2                |
| BB0658 | Chromosome       | None               | IM                | BB0658 phosphoglycerate mutase (gpmA) {Escherichia coli}                                    | 1                     | 1                   | 1                  | 1                |
| BB0660 | Chromosome       | None               | CH                | BB0660 GTP-binding protein (era) {Escherichia coli}                                         | 1                     | 1                   | 1                  | 1                |
| BB0667 | Chromosome       | None               | HX                | BB0667 conserved hypothetical protein {Borrelia burgdorferi}                                | 1                     | 1                   | 1                  | 1                |
| BB0668 | Chromosome       | None               | F                 | BB0668 flagellar filament outer layer protein (flaA) {Borrelia burgdorferi}                 | 1                     | 1                   | 0.5                | 0.5              |
| BB0670 | Chromosome       | PF33               | CH                | BB0670 purine-binding chemotaxis protein (cheW-3) {Borrelia burgdorferi}                    | 3                     | 3                   | 3                  | 3                |
| BB0672 | Chromosome       | PF14               | CH                | BB0672 chemotaxis response regulator (cheY-3) {Borrelia burgdorferi}                        | 1                     | 1                   | 1                  | 1                |
| BB0673 | Chromosome       | None               | HX                | BB0673 conserved hypothetical protein {Borrelia burgdorferi}                                | 2                     | 2                   | 2                  | 2                |
| BB0675 | Chromosome       | None               | U                 | BB0675 hypothetical protein                                                                 | 1                     | 1                   | 1                  | 1                |
| BB0676 | Chromosome       | None               | IM                | BB0676 phosphoglycolate phosphatase (gph) {Haemophilus influenzae}                          | 1                     | 1                   | 1                  | 1                |
| BB0679 | Chromosome       | PF130              | FM                | BB0679 ribose/galactose ABC transporter, permease protein (rbsC-2) {Mycoplasma pneumoniae}  | 1                     | 1                   | 1                  | 1                |
| BB0682 | Chromosome       | None               | HX                | BB0682 conserved hypothetical protein {Haemophilus influenzae}                              | 3                     | 3                   | 2                  | 2                |
| BB0683 | Chromosome       | None               | FM                | BB0683 3-hydroxy-3-methylglutaryl-CoA synthase {Arabidopsis thaliana}                       | 3                     | 3                   | 3                  | 3                |
| BB0684 | Chromosome       | None               | X                 | BB0684 carotenoid biosynthesis protein, putative {Sulfolobus solfataricus}                  | 1                     | 1                   | 0.5                | 0.5              |
| BB0685 | Chromosome       | None               | FM                | BB0685 3-hydroxy-3-methylglutaryl-CoA reductase (mvaA) {Pseudomonas mevalonii}              | 1                     | 1                   | 1                  | 1                |
| BB0686 | Chromosome       | None               | FM                | BB0686 mevalonate pyrophosphate decarboxylase {Saccharomyces cerevisiae}                    | 1                     | 1                   | 1                  | 1                |
| BB0687 | Chromosome       | None               | FM                | BB0687 ribose/galactose ABC transporters, permease protein (rbsC-1)                         | 2                     | 2                   | 1                  | 1                |
| BB0691 | Chromosome       | PF11               | TF                | BB0691 translation elongation factor G (fus-2) {Thermotoga maritima}                        | 3                     | 3                   | 3                  | 3                |
| BB0693 | Chromosome       | None               | GM                | BB0693 xylose operon regulatory protein (xylR-1) {Thermophilic bacterium RT8.B4.}           | 3                     | 3                   | 2                  | 2                |
| BB0694 | Chromosome       | PF10               | PE                | BB0694 signal recognition particle protein (ffh) {Bacillus subtilis}                        | 3                     | 3                   | 3                  | 3                |
| BB0695 | Chromosome       | None               | RP                | BB0695 ribosomal protein S16 (rpsP) {Bacillus subtilis}                                     | 3                     | 3                   | 0.5                | 0.5              |
| BB0698 | Chromosome       | None               | ARS               | BB0698 tRNA (guanine-N1)-methyltransferase (trmD) {Mycoplasma genitalium}                   | 3                     | 3                   | 1                  | 1                |
| BB0699 | Chromosome       | None               | RP                | BB0699 ribosomal protein L19 (rplS) {Escherichia coli}                                      | 1                     | 1                   | 1                  | 1                |
| BB0705 | Chromosome       | None               | TR                | BB0705 ribonuclease III (rnc) {Bacillus subtilis}                                           | 1                     | 1                   | 1                  | 1                |

|         | Genetic element* | Paralogous family* | Functional group* | Gene description*                                                                 | Dexa-treated medulla† | Dexa-treated heart† | Competent medulla‡ | Competent heart‡ |
|---------|------------------|--------------------|-------------------|-----------------------------------------------------------------------------------|-----------------------|---------------------|--------------------|------------------|
| BB0706  | Chromosome       | None               | TR                | BB0706 polynucleotide adenylyltransferase (papS) {Bacillus subtilis}              | 3                     | 3                   | 2                  | 2                |
| BB0709  | Chromosome       | None               | HX                | BB0709 conserved hypothetical protein {Escherichia coli}                          | 3                     | 3                   | 2                  | 2                |
| BB0710  | Chromosome       | None               | R                 | BB0710 DNA primase (dnaG) {Bacillus subtilis}                                     | 2                     | 2                   | 2                  | 2                |
| BB0718  | Chromosome       | PF119              | CE                | BB0718 penicillin-binding protein (pbp-2) {Haemophilus influenzae}                | 1                     | 1                   | 1                  | 1                |
| BB0730  | Chromosome       | None               | IM                | BB0730 glucose-6-phosphate isomerase (pgi) {Plasmodium falciparum}                | 1                     | 1                   | 1                  | 1                |
| BB0755  | Chromosome       | None               | HX                | BB0755 conserved hypothetical protein {Treponema pallidum}                        | 1                     | 1                   | 1                  | 1                |
| BB0756  | Chromosome       | None               | U                 | BB0756 hypothetical protein                                                       | 1                     | 1                   | 1                  | 1                |
| BB0776  | Chromosome       | None               | U                 | BB0776 hypothetical protein                                                       | 3                     | 3                   | 2                  | 2                |
| BB0784  | Chromosome       | None               | HX                | BB0784 conserved hypothetical protein {Haemophilus influenzae}                    | 1                     | 1                   | 0.5                | 0.5              |
| BB0795  | Chromosome       | None               | CE                | BB0795 outer membrane protein {Neisseria gonorrhoeae}                             | 3                     | 3                   | 2                  | 2                |
| BB0800  | Chromosome       | None               | TR                | BB0800 N-utilization substance protein A (nusA) {Bacillus subtilis}               | 1                     | 1                   | 0.5                | 0.5              |
| BB0801  | Chromosome       | None               | TF                | BB0801 translation initiation factor 2 (infB) {Bacillus stearothermophilus}       | 3                     | 3                   | 2                  | 2                |
| BB0803  | Chromosome       | None               | ARS               | BB0803 tRNA pseudouridine 55 synthase (truB) {Escherichia coli}                   | 3                     | 3                   | 2                  | 2                |
| BB0809  | Chromosome       | None               | ARS               | BB0809 tRNA-guanine transglycosylase (tgt) {Zymomonas mobilis}                    | 3                     | 3                   | 1                  | 1                |
| BB0818  | Chromosome       | None               | HX                | BB0818 conserved hypothetical protein {Escherichia coli}                          | 3                     | 3                   | 1                  | 1                |
| BB0835  | Chromosome       | None               | IM                | BB0835 phosphomannomutase (cpsG) {Haemophilus influenzae}                         | 1                     | 1                   | 0.5                | 0.5              |
| BBA05   | lp54             | None               | CE                | BBA05 antigen S1                                                                  | 1                     | 1                   | 0.5                | 0.5              |
| BBA14   | lp54             | None               | HX                | BBA14 conserved hypothetical protein                                              | 0.5                   | 0.5                 | 0.5                | 0.5              |
| BBA25   | lp54             | PF74               | CE                | BBA25 decorin binding protein B (dbpB)                                            | 2                     | 2                   | 1                  | 1                |
| BBA31   | lp54             | PF145              | HX                | BBA31 conserved hypothetical protein {Streptococcus thermophilus}                 | 1                     | 1                   | 1                  | 1                |
| BBG08   | lp28-2           | PF32               | D                 | BBG08 plasmid partition protein, putative {Bacillus subtilis}                     | 3                     | 3                   | 1                  | 1                |
| BBG18   | lp28-2           | None               | U                 | BBG18 hypothetical protein                                                        | 1                     | 1                   | 1                  | 1                |
| BBG22   | lp28-2           | PF86               | U                 | BBG22 hypothetical protein                                                        | 1                     | 1                   | 1                  | 1                |
| BBG23   | lp28-2           | PF86               | U                 | BBG23 hypothetical protein                                                        | 1                     | 1                   | 1                  | 1                |
| BBH07   | lp28-3           | PF50               | HX                | BBH07 conserved hypothetical protein, authentic frameshift {Borrelia burgdorferi} | 1                     | 1                   | 1                  | 1                |
| BBH17   | lp28-3           | None               | U                 | BBH17 hypothetical protein                                                        | 3                     | 3                   | 2                  | 2                |
| BBH24.1 | lp28-3           | PF86               | HX                | BBH24.1 conserved hypothetical protein, pseudogene {Borrelia burgdorferi}         | 0.5                   | 0.5                 | 0.5                | 0.5              |
| BBH27   | lp28-2           | PF50               | HX                | BBH27 conserved hypothetical protein {Borrelia burgdorferi}                       | 3                     | 3                   | 2                  | 2                |
| BBH31   | lp28-3           | None               | U                 | BBH31 hypothetical protein                                                        | 3                     | 3                   | 1                  | 1                |
| BBH37   | lp28-3           | PF12               | U                 | BBH37 hypothetical protein                                                        | 3                     | 3                   | 2                  | 2                |
| BBI02.1 | lp28-4           | None               | HX                | BBI02.1 conserved hypothetical protein, pseudogene {Borrelia burgdorferi}         | 3                     | 3                   | 1                  | 1                |
| BBI02.2 | lp28-4           | PF57               | U                 | BBI02.2 Brute Force ORF                                                           | 1                     | 1                   | 0.5                | 0.5              |
| BBI11   | lp28-4           | None               | U                 | BBI11 hypothetical protein                                                        | 3                     | 3                   | 2                  | 2                |
| BBI13   | lp28-4           | None               | HX                | BBI13 conserved hypothetical protein {Haemophilus influenzae}                     | 3                     | 3                   | 1                  | 1                |
| BBI14   | lp28-4           | PF60               | U                 | BBI14 hypothetical protein                                                        | 3                     | 3                   | 1                  | 1                |
| BBI18   | lp28-4           | None               | U                 | BBI18 hypothetical protein                                                        | 3                     | 3                   | 3                  | 3                |

|         | Genetic element* | Paralogous family* | Functional group* | Gene description*                                                                                  | Dexa-treated medulla† | Dexa-treated heart† | Competent medulla‡ | Competent heart‡ |
|---------|------------------|--------------------|-------------------|----------------------------------------------------------------------------------------------------|-----------------------|---------------------|--------------------|------------------|
| BBJ29   | lp38             | PF90               | U                 | BBJ29 hypothetical protein                                                                         | 1                     | 1                   | 1                  | 1                |
| BBK02.1 | lp36             | PF1                | HX                | BBK02.1 conserved hypothetical protein, pseudogene {Borrelia burgdorferi}                          | 3                     | 3                   | 1                  | 1                |
| BBK23   | lp36             | PF62               | U                 | BBK23 hypothetical protein                                                                         | 1                     | 1                   | 0.5                | 0.5              |
| BBK35   | lp36             | PF68               | U                 | BBK35 hypothetical protein                                                                         | 3                     | 3                   | 1                  | 1                |
| BBK36   | lp36             | PF66               | U                 | BBK36 hypothetical protein                                                                         | 3                     | 3                   | 1                  | 1                |
| BBK47   | lp36             | PF69               | U                 | BBK47 hypothetical protein                                                                         | 2                     | 2                   | 1                  | 1                |
| BBL19   | cp32-8           | PF139              | HX                | BBL19 conserved hypothetical protein {Borrelia burgdorferi}                                        | 1                     | 1                   | 0.5                | 0.5              |
| BBM07   | cp32-6           | PF150              | HX                | BBM07 conserved hypothetical protein {Borrelia burgdorferi}                                        | 3                     | 3                   | 1                  | 1                |
| BBM41   | cp32-6           | PF115              | U                 | BBM41 hypothetical protein                                                                         | 3                     | 3                   | 1                  | 1                |
| BBN06   | cp32-9           | PF149              | U                 | BBN06 hypothetical protein, paralogous family 149, authentic frameshift                            | 1                     | 1                   | 1                  | 1                |
| BBN16   | cp32-9           | PF157              | U                 | BBN16 hypothetical protein, paralogous family 157, authentic frameshift                            | 1                     | 1                   | 1                  | 1                |
| BBN17   | cp32-9           | PF159              | U                 | BBN17 hypothetical protein                                                                         | 2                     | 2                   | 2                  | 2                |
| BBN18   | cp32-9           | PF160              | U                 | BBN18 hypothetical protein, paralogous family 160, authentic point mutation                        | 3                     | 3                   | 2                  | 2                |
| BBN19   | cp32-9           | PF139              | HX                | BBN19 conserved hypothetical protein {Borrelia burgdorferi}                                        | 3                     | 3                   | 2                  | 2                |
| BBN22   | cp32-9           | PF142              | HX                | BBN22 conserved hypothetical protein, authentic frameshift {Borrelia burgdorferi}                  | 2                     | 2                   | 1                  | 1                |
| BBN23   | cp32-9           | PF109              | HE                | BBN23 pore-forming hemolysin (blyA) {Borrelia burgdorferi}                                         | 2                     | 2                   | 2                  | 2                |
| BBN27   | cp32-9           | PF80               | HX                | BBN27 conserved hypothetical protein {Borrelia burgdorferi}                                        | 2                     | 2                   | 1                  | 1                |
| BBN28   | cp32-9           | PF113              | CE                | BBN28 lipoprotein (lp) {Borrelia burgdorferi}                                                      | 2                     | 2                   | 1                  | 1                |
| BBN29   | cp32-9           | PF161              | U                 | BBN29 hypothetical protein, paralogous family 161, authentic point mutation {Borrelia burgdorferi} | 2                     | 2                   | 2                  | 2                |
| BBN30   | cp32-9           | PF57               | HX                | BBN30 conserved hypothetical protein {Borrelia burgdorferi}                                        | 1                     | 1                   | 1                  | 1                |
| BBN31   | cp32-9           | PF50               | HX                | BBN31 conserved hypothetical protein {Borrelia burgdorferi}                                        | 1                     | 1                   | 1                  | 1                |
| BBN32   | cp32-9           | PF32               | HX                | BBN32 plasmid partition protein, putative {Bacillus subtilis}                                      | 1                     | 1                   | 1                  | 1                |
| BBN33   | cp32-9           | PF49               | HX                | BBN33 conserved hypothetical protein {Borrelia burgdorferi}                                        | 1                     | 1                   | 1                  | 1                |
| BBN34   | cp32-9           | PF80               | HX                | BBN34 conserved hypothetical protein {Borrelia burgdorferi}                                        | 1                     | 1                   | 1                  | 1                |
| BBN36   | cp32-9           | PF144              | HX                | BBN36 conserved hypothetical protein {Borrelia burgdorferi}                                        | 2                     | 2                   | 2                  | 2                |
| BBN37   | cp32-9           | PF96               | U                 | BBN37 hypothetical protein, paralogous family 96, authentic point mutation {Borrelia burgdorferi}  | 1                     | 1                   | 1                  | 1                |
| BBN38   | cp32-9           | PF162              | CE                | BBN38 erpA protein (erpA) {Borrelia burgdorferi}                                                   | 1                     | 1                   | 1                  | 1                |
| BBN39   | cp32-9           | PF163              | CE                | BBN39 erpB2 protein (erpB2) {Borrelia burgdorferi}                                                 | 0.5                   | 0.5                 | 0.5                | 0.5              |
| BBN41   | cp32-9           | PF114              | U                 | BBN41 hypothetical protein                                                                         | 1                     | 1                   | 1                  | 1                |
| BBN42   | cp32-9           | PF115              | U                 | BBN42 hypothetical protein                                                                         | 1                     | 1                   | 1                  | 1                |
| BBO04   | cp32-7           | PF148              | U                 | BBO04 hypothetical protein                                                                         | 1                     | 1                   | 1                  | 1                |
| BBO08   | cp32-7           | PF107              | HX                | BBO08 conserved hypothetical protein {Borrelia burgdorferi}                                        | 3                     | 3                   | 1                  | 1                |
| BBO09   | cp32-7           | PF108              | HX                | BBO09 conserved hypothetical protein {Borrelia burgdorferi}                                        | 3                     | 3                   | 1                  | 1                |
| BBO10   | cp32-7           | PF151              | HX                | BBO10 conserved hypothetical protein {Borrelia burgdorferi}                                        | 3                     | 3                   | 1                  | 1                |
| BBO11   | cp32-7           | PF152              | U                 | BBO11 hypothetical protein                                                                         | 3                     | 3                   | 1                  | 1                |
| BBO15   | cp32-7           | PF156              | U                 | BBO15 hypothetical protein                                                                         | 3                     | 3                   | 1                  | 1                |

|       | Genetic element* | Paralogous family* | Functional group* | Gene description*                                                       | Dexa-treated medulla† | Dexa-treated heart† | Competent medulla‡ | Competent heart‡ |
|-------|------------------|--------------------|-------------------|-------------------------------------------------------------------------|-----------------------|---------------------|--------------------|------------------|
| BBO18 | cp32-7           | None               | U                 | BBO18 hypothetical protein                                              | 1                     | 1                   | 1                  | 1                |
| BBO20 | cp32-7           | PF140              | HX                | BBO20 conserved hypothetical protein {Borrelia burgdorferi}             | 3                     | 3                   | 1                  | 1                |
| BBO22 | cp32-7           | PF142              | HX                | BBO22 conserved hypothetical protein {Borrelia burgdorferi}             | 3                     | 3                   | 2                  | 2                |
| BBO27 | cp32-7           | PF80               | HX                | BBO27 conserved hypothetical protein {Borrelia burgdorferi}             | 3                     | 3                   | 3                  | 3                |
| BBO31 | cp32-7           | PF50               | HX                | BBO31 conserved hypothetical protein {Borrelia burgdorferi}             | 3                     | 3                   | 1                  | 1                |
| BBO32 | cp32-7           | PF32               | HX                | BBO32 plasmid partition protein, putative {Bacillus subtilis}           | 3                     | 3                   | 1                  | 1                |
| BBO33 | cp32-7           | PF49               | HX                | BBO33 conserved hypothetical protein {Borrelia burgdorferi}             | 3                     | 3                   | 1                  | 1                |
| BBO36 | cp32-7           | PF165              | HX                | BBO36 conserved hypothetical protein {Borrelia burgdorferi}             | 2                     | 2                   | 1                  | 1                |
| BBO37 | cp32-7           | PF144              | HX                | BBO37 conserved hypothetical protein {Borrelia burgdorferi}             | 1                     | 1                   | 1                  | 1                |
| BBO38 | cp32-7           | PF96               | HX                | BBO38 conserved hypothetical protein {Borrelia burgdorferi}             | 1                     | 1                   | 1                  | 1                |
| BBO43 | cp32-7           | PF115              | U                 | BBO43 hypothetical protein                                              | 0.5                   | 0.5                 | 0.5                | 0.5              |
| BBP01 | cp32-1           | PF146              | U                 | BBP01 hypothetical protein                                              | 3                     | 3                   | 1                  | 1                |
| BBP02 | cp32-1           | PF147              | U                 | BBP02 hypothetical protein                                              | 1                     | 1                   | 1                  | 1                |
| BBP04 | cp32-1           | PF148              | U                 | BBP04 hypothetical protein                                              | 1                     | 1                   | 1                  | 1                |
| BBP05 | cp32-1           | PF148              | U                 | BBP05 hypothetical protein                                              | 3                     | 3                   | 1                  | 1                |
| BBP09 | cp32-1           | PF108              | HX                | BBP09 conserved hypothetical protein {Borrelia burgdorferi}             | 3                     | 3                   | 1                  | 1                |
| BBP21 | cp32-1           | PF141              | HX                | BBP21 conserved hypothetical protein {Borrelia burgdorferi}             | 3                     | 3                   | 1                  | 1                |
| BBQ40 | lp56             | PF32               | HX                | BBQ40 plasmid partition protein, putative {Bacillus subtilis}           | 2                     | 2                   | 1                  | 1                |
| BBQ49 | lp56             | PF115              | U                 | BBQ49 hypothetical protein                                              | 1                     | 1                   | 0.5                | 0.5              |
| BBQ51 | lp56             | PF146              | U                 | BBQ51 hypothetical protein, paralogous family 146, authentic frameshift | 1                     | 1                   | 1                  | 1                |
| BBR08 | cp32-4           | PF107              | HX                | BBR08 conserved hypothetical protein {Borrelia burgdorferi}             | 3                     | 3                   | 1                  | 1                |
| BBS17 | cp32-3           | PF159              | U                 | BBS17 hypothetical protein                                              | 0.5                   | 0.5                 | 0.5                | 0.5              |
| BBT01 | lp5              | PF57               | U                 | BBT01 hypothetical protein                                              | 3                     | 3                   | 1                  | 1                |
| BBU11 | lp21             | PF137              | HX                | BBU11 conserved hypothetical protein {Mycobacterium tuberculosis}       | 3                     | 3                   | 1                  | 1                |

Dexa, dexamethasone. The functional categories are: ARS, amino acid biosynthesis; B, biosynthesis; CE, cell envelope; CH, chemotaxis proteins, D, cell division; F, flagellar biosynthesis; FM, fatty acid metabolism; GM, general metabolism; HE, hemolysins; HS, heat-shock proteins; HX, conserved hypothetical proteins; IM, intermediary metabolism; NM, nucleotide metabolism; PD, protein degradation; PE, protein export; R, replication; RP, ribosomal proteins; TF, translation factors; TP, transport proteins; TR, transcription; U, hypothetical proteins; X, other.

\* All designations used are according to *B. burgdorferi* genome database (<http://www.tigr.org/tigr-scripts/CMR2/GenomePage3.spl?database=gbb>)

† Differential expression analysis using a custom-amplified library (DECAL) performed on medulla and heart tissue samples taken from dexamethasone-treated NHPs.

‡ DECAL performed on medulla and heart tissue samples taken from immunocompetent NHPs.
