# Supplementary material
Source: PubMed Central journal article supplement (PMC307674)
Supplement: pnas_100_26_15953__6.pdf [file pnas_100_26_15953__6.pdf]

**Table 3. List of genes with similar expression profiles in the CNS and heart of steroid treated and untreated *B. burgdorferi*-infected NHPs**

| Gene*  | Genetic element* | Paralogous family* | Functional group* | Gene description*                                                                                          | Dexa-treated medulla† | Dexa-treated heart† | Competent medulla‡ | Competent heart‡ |
|--------|------------------|--------------------|-------------------|------------------------------------------------------------------------------------------------------------|-----------------------|---------------------|--------------------|------------------|
| BB0013 | Chromosome       | None               | U                 | BB0013 hypothetical protein                                                                                | 3                     | 2                   | 3                  | 2                |
| BB0016 | Chromosome       | None               | IM                | BB0016 glpE protein (glpE) {Haemophilus influenzae}                                                        | 3                     | 1                   | 3                  | 1                |
| BB0017 | Chromosome       | None               | HX                | BB0017 conserved hypothetical integral membrane protein {Bacillus subtilis}                                | 3                     | 0.5                 | 2                  | 0.5              |
| BB0020 | Chromosome       | PF6                | IM                | BB0020 pyrophosphate-fructose 6-phosphate 1-phosphotransferase, beta subunit (pfpB) {Borrelia burgdorferi} | 3                     | 1                   | 2                  | 1                |
| BB0028 | Chromosome       | None               | U                 | BB0028 hypothetical protein                                                                                | 2                     | 0                   | 1                  | 0                |
| BB0035 | Chromosome       | None               | R                 | BB0035 DNA topoisomerase IV (parC) {Borrelia burgdorferi}                                                  | 2                     | 1                   | 3                  | 1                |
| BB0051 | Chromosome       | PF47               | HX                | BB0051 conserved hypothetical integral membrane protein {Bacillus subtilis}                                | 3                     | 2                   | 3                  | 2                |
| BB0058 | Chromosome       | PF123              | U                 | BB0058 hypothetical protein                                                                                | 2                     | 1                   | 1                  | 0.5              |
| BB0070 | Chromosome       | None               | HX                | BB0070 conserved hypothetical protein {Synechocystis PCC6803}                                              | 0                     | 2                   | 0                  | 2                |
| BB0074 | Chromosome       | PF43               | TF                | BB0074 peptide chain release factor 2 (prfB) {Salmonella choleraesuis}                                     | 1                     | 0.5                 | 3                  | 0.5              |
| BB0104 | Chromosome       | None               | PD                | BB0104 periplasmic serine protease DO (htrA) {Haemophilus influenzae}                                      | 2                     | 0                   | 2                  | 1                |
| BB0115 | Chromosome       | None               | RP                | BB0115 ribosomal protein S6 (rpsF) {Odontella sinensis}                                                    | 3                     | 0                   | 2                  | 1                |
| BB0116 | Chromosome       | PF16               | TP                | BB0116 PTS system, maltose and glucose-specific II ABC component (malX) {Escherichia coli}                 | 3                     | 0                   | 2                  | 0.5              |
| BB0117 | Chromosome       | None               | HE                | BB0117 hemolysin III (yplQ) {Bacillus subtilis}                                                            | 3                     | 0                   | 1                  | 0.5              |
| BB0131 | Chromosome       | None               | R                 | BB0131 recA protein (recA) {Borrelia burgdorferi}                                                          | 3                     | 0.5                 | 1                  | 0.5              |
| BB0137 | Chromosome       | PF25               | FM                | BB0137 long-chain-fatty-acid CoA ligase {Synechocystis PCC6803}                                            | 3                     | 1                   | 1                  | 0                |
| BB0174 | Chromosome       | None               | U                 | BB0174 hypothetical protein                                                                                | 1                     | 0.5                 | 2                  | 0.5              |
| BB0181 | Chromosome       | None               | F                 | BB0181 flagellar hook-associated protein (flgK) {Borrelia burgdorferi}                                     | 1                     | 0.5                 | 2                  | 0.5              |
| BB0196 | Chromosome       | PF43               | TF                | BB0196 peptide chain release factor 1 (prfA) {Haemophilus influenzae}                                      | 1                     | 0                   | 1                  | 0                |
| BB0209 | Chromosome       | None               | U                 | BB0209 hypothetical protein                                                                                | 3                     | 1                   | 1                  | 0.5              |
| BB0210 | Chromosome       | None               | CE                | BB0210 surface-located membrane protein 1 (Imp1) {Mycoplasma hominis}                                      | 3                     | 0.5                 | 3                  | 0.5              |
| BB0217 | Chromosome       | PF41               | TP                | BB0217 phosphate ABC transporter, permease protein (pstA) {Synechocystis PCC6803}                          | 3                     | 1                   | 1                  | 0                |
| BB0220 | Chromosome       | None               | ARS               | BB0220 alanyl-tRNA synthetase (alaS) {Escherichia coli}                                                    | 3                     | 2                   | 2                  | 0.5              |
| BB0228 | Chromosome       | None               | HX                | BB0228 conserved hypothetical protein {Saccharomyces cerevisiae}                                           | 3                     | 0                   | 1                  | 0                |
| BB0243 | Chromosome       | None               | IM                | BB0243 glycerol-3-phosphate dehydrogenase, anaerobic (glpA) {Haemophilus influenzae}                       | 2                     | 0                   | 3                  | 0.5              |
| BB0252 | Chromosome       | None               | HX                | BB0252 conserved hypothetical integral membrane protein {Methanococcus jannaschii}                         | 2                     | 1                   | 2                  | 0.5              |
| BB0253 | Chromosome       | PF22               | PD                | BB0253 ATP-dependent protease LA (lon-1) {Borrelia burgdorferi}                                            | 3                     | 2                   | 3                  | 2                |
| BB0257 | Chromosome       | None               | D                 | BB0257 cell division protein, putative {Escherichia coli}                                                  | 2                     | 1                   | 1                  | 0.5              |

| Gene*  | Genetic element* | Paralogous family* | Functional group* | Gene description*                                                                                | Dexa-treated medulla† | Dexa-treated heart† | Competent medulla‡ | Competent heart‡ |
|--------|------------------|--------------------|-------------------|--------------------------------------------------------------------------------------------------|-----------------------|---------------------|--------------------|------------------|
| BB0264 | Chromosome       | PF9                | HS                | BB0264 heat shock protein 70 (dnaK-1) { <i>Borrelia burgdorferi</i> }                            | 3                     | 1                   | 2                  | 1                |
| BB0277 | Chromosome       | None               | F                 | BB0277 flagellar motor switch protein (fliN) { <i>Borrelia burgdorferi</i> }                     | 1                     | 0.5                 | 2                  | 0.5              |
| BB0290 | Chromosome       | PF38               | F                 | BB0290 flagellar motor switch protein (fliG-2) { <i>Borrelia burgdorferi</i> }                   | 1                     | 0.5                 | 3                  | 0.5              |
| BB0308 | Chromosome       | None               | U                 | BB0308 hypothetical protein                                                                      | 3                     | 0.5                 | 1                  | 0.5              |
| BB0310 | Chromosome       | None               | U                 | BB0310 hypothetical protein                                                                      | 3                     | 0.5                 | 3                  | 0.5              |
| BB0311 | Chromosome       | None               | HX                | BB0311 conserved hypothetical protein { <i>Haemophilus influenzae</i> }                          | 3                     | 0.5                 | 3                  | 0.5              |
| BB0324 | Chromosome       | None               | U                 | BB0324 hypothetical protein                                                                      | 3                     | 1                   | 2                  | 1                |
| BB0333 | Chromosome       | PF41               | TP                | BB0333 oligopeptide ABC transporter, permease protein (oppC-1) { <i>Haemophilus influenzae</i> } | 3                     | 2                   | 2                  | 0.5              |
| BB0334 | Chromosome       | PF4                | TP                | BB0334 oligopeptide ABC transporter, ATP-binding protein (oppD) { <i>Bacillus subtilis</i> }     | 3                     | 0.5                 | 1                  | 0.5              |
| BB0351 | Chromosome       | None               | U                 | BB0351 hypothetical protein                                                                      | 2                     | 1                   | 0.5                | 0                |
| BB0354 | Chromosome       | None               | U                 | BB0354 hypothetical protein                                                                      | 2                     | 0                   | 1                  | 0                |
| BB0356 | Chromosome       | None               | U                 | BB0356 hypothetical protein                                                                      | 2                     | 1                   | 2                  | 0.5              |
| BB0362 | Chromosome       | None               | PE                | BB0362 prolipoprotein diacylglycerol transferase (lgt) { <i>Escherichia coli</i> }               | 1                     | 0.5                 | 0.5                | 0                |
| BB0372 | Chromosome       | None               | ARS               | BB0372 glutamyl-tRNA synthetase (gltX) { <i>Rhizobium meliloti</i> }                             | 2                     | 0.5                 | 1                  | 0.5              |
| BB0373 | Chromosome       | None               | U                 | BB0373 hypothetical protein                                                                      | 3                     | 1                   | 3                  | 1                |
| BB0374 | Chromosome       | None               | U                 | BB0374 hypothetical protein                                                                      | 3                     | 1                   | 2                  | 0.5              |
| BB0377 | Chromosome       | None               | HX                | BB0377 conserved hypothetical protein { <i>Haemophilus influenzae</i> }                          | 0.5                   | 1                   | 0                  | 1                |
| BB0405 | Chromosome       | PF35               | U                 | BB0405 hypothetical protein                                                                      | 3                     | 0.5                 | 1                  | 0                |
| BB0419 | Chromosome       | PF14               | GM                | BB0419 response regulatory protein (rrp-1) { <i>Synechocystis PCC6803</i> }                      | 0.5                   | 3                   | 0.5                | 3                |
| BB0420 | Chromosome       | PF14               | GM                | BB0420 sensory transduction histidine kinase/response regulator { <i>Synechocystis PCC6803</i> } | 1                     | 2                   | 0.5                | 1                |
| BB0447 | Chromosome       | None               | TP                | BB0447 Na <sup>+</sup> /H <sup>+</sup> antiporter (napA) { <i>Enterococcus hirae</i> }           | 2                     | 0                   | 1                  | 0                |
| BB0464 | Chromosome       | None               | HX                | BB0464 hypothetical                                                                              | 1                     | 2                   | 0.5                | 1                |
| BB0482 | Chromosome       | None               | RP                | BB0482 ribosomal protein S19 (rpsS) { <i>Borrelia burgdorferi</i> }                              | 1                     | 0.5                 | 1                  | 0.5              |
| BB0517 | Chromosome       | PF15               | HS                | BB0517 heat shock protein (dnaJ-1) { <i>Borrelia burgdorferi</i> }                               | 3                     | 0.5                 | 3                  | 0.5              |
| BB0518 | Chromosome       | None               | HS                | BB0518 heat shock protein 70 (dnaK-2) { <i>Borrelia burgdorferi</i> }                            | 3                     | 0                   | 2                  | 0                |
| BB0544 | Chromosome       | None               | NM                | BB0544 phosphoribosyl pyrophosphate synthetase (prs) { <i>Mycoplasma pneumoniae</i> }            | 2                     | 0                   | 1                  | 0                |
| BB0546 | Chromosome       | None               | U                 | BB0546 hypothetical protein                                                                      | 2                     | 0                   | 1                  | 0                |
| BB0560 | Chromosome       | None               | HS                | BB0560 heat shock protein 90 (htpG) { <i>Borrelia burgdorferi</i> }                              | 2                     | 0.5                 | 2                  | 0.5              |
| BB0575 | Chromosome       | None               | NM                | BB0575 CTP synthase (pyrG) { <i>Methanococcus jannaschii</i> }                                   | 1                     | 0                   | 0.5                | 0                |

| Gene*  | Genetic element* | Paralogous family* | Functional group* | Gene description*                                                                         | Dexa-treated medulla† | Dexa-treated heart† | Competent medulla‡ | Competent heart‡ |
|--------|------------------|--------------------|-------------------|-------------------------------------------------------------------------------------------|-----------------------|---------------------|--------------------|------------------|
| BB0580 | Chromosome       | None               | HX                | BB0580 conserved hypothetical integral membrane protein {Synechocystis PCC6803}           | 0                     | 0.5                 | 0.5                | 1                |
| BB0581 | Chromosome       | PF20               | R                 | BB0581 DNA recombinase (recG) {Synechocystis PCC6803}                                     | 3                     | 1                   | 3                  | 1                |
| BB0591 | Chromosome       | None               | X                 | BB0591 competence locus E, putative {Bacillus subtilis}                                   | 1                     | 0.5                 | 1                  | 0.5              |
| BB0600 | Chromosome       | None               | U                 | BB0600 hypothetical protein                                                               | 2                     | 1                   | 1                  | 0                |
| BB0602 | Chromosome       | None               | HS                | BB0602 chaperonin, putative {Coxiella burnetti}                                           | 3                     | 0.5                 | 1                  | 0                |
| BB0616 | Chromosome       | None               | HX                | BB0616 conserved hypothetical integral membrane protein {Bacillus subtilis}               | 3                     | 0.5                 | 1                  | 0.5              |
| BB0625 | Chromosome       | None               | CE                | BB0625 N-acetylmuramoyl-L-alanine amidase, putative {Enterococcus faecalis}               | 3                     | 2                   | 2                  | 1                |
| BB0627 | Chromosome       | PF131              | PD                | BB0627 vacuolar X-prolyl dipeptidyl aminopeptidase I (pepX) {Mycobacterium leprae}        | 3                     | 1                   | 1                  | 0.5              |
| BB0640 | Chromosome       | PF41               | TP                | BB0640 spermidine/putrescine ABC transporter, permease protein (potC) {Escherichia coli}  | 3                     | 1                   | 1                  | 0                |
| BB0643 | Chromosome       | PF122              | HX                | BB0643 conserved hypothetical GTP-binding protein {Mycoplasma genitalium}                 | 3                     | 0.5                 | 1                  | 0.5              |
| BB0644 | Chromosome       | None               | HX                | BB0644 conserved hypothetical protein {Haemophilus influenzae}                            | 3                     | 1                   | 1                  | 0                |
| BB0651 | Chromosome       | None               | HX                | BB0651 conserved hypothetical protein {Haemophilus influenzae}                            | 2                     | 0.5                 | 0.5                | 0.5              |
| BB0666 | Chromosome       | None               | U                 | BB0666 hypothetical protein                                                               | 2                     | 1                   | 0.5                | 0                |
| BB0680 | Chromosome       | PF13               | CH                | BB0680 methyl-accepting chemotaxis protein (mcp-4) {Escherichia coli}                     | 3                     | 2                   | 3                  | 1                |
| BB0687 | Chromosome       | None               | FM                | BB0687 phosphomevalonate kinase, putative {Saccharomyces cerevisiae}                      | 1                     | 0.5                 | 2                  | 0.5              |
| BB0688 | Chromosome       | None               | FM                | BB0688 mevalonate kinase {Methanococcus jannaschii}                                       | 3                     | 2                   | 3                  | 2                |
| BB0724 | Chromosome       | None               | TP                | BB0724 K+ transport protein (ntpJ) {Enterococcus hirae}                                   | 3                     | 2                   | 2                  | 1                |
| BB0726 | Chromosome       | PF32               | TP                | BB0726 minD-related ATP-binding protein (ylxH-3) {Bacillus subtilis}                      | 3                     | 1                   | 1                  | 0                |
| BB0731 | Chromosome       | None               | HX                | BB0731 conserved hypothetical protein {Leptospira interrogans serovar lai}                | 3                     | 0.5                 | 2                  | 0.5              |
| BB0732 | Chromosome       | None               | CE                | BB0732 penicillin-binding protein (pbp-3) {Neisseria gonorrhoeae}                         | 3                     | 0.5                 | 2                  | 0.5              |
| BB0738 | Chromosome       | PF34               | ARS               | BB0738 valyl-tRNA synthetase (valS) {Bacillus stearothermophilus}                         | 3                     | 0.5                 | 3                  | 0.5              |
| BB0740 | Chromosome       | None               | HX                | BB0740 conserved hypothetical protein {Escherichia coli}                                  | 2                     | 1                   | 1                  | 0.5              |
| BB0742 | Chromosome       | PF4                | TP                | BB0742 ABC transporter, ATP-binding protein {Synechocystis PCC6803}                       | 3                     | 0.5                 | 3                  | 0.5              |
| BB0743 | Chromosome       | None               | U                 | BB0743 hypothetical protein                                                               | 2                     | 1                   | 1                  | 0                |
| BB0747 | Chromosome       | PF41               | TP                | BB0747 oligopeptide ABC transporter, permease protein (oppB-2) {Bacillus subtilis}        | 2                     | 1                   | 2                  | 1                |
| BB0752 | Chromosome       | None               | U                 | BB0752 hypothetical protein                                                               | 3                     | 2                   | 3                  | 2                |
| BB0757 | Chromosome       | PF3                | PD                | BB0757 ATP-dependent Clp protease proteolytic component (clpP-2) {Haemophilus influenzae} | 2                     | 0                   | 3                  | 0.5              |
| BB0768 | Chromosome       | None               | B                 | BB0768 pyridoxal kinase (pdxK) {Salmonella choleraesuis}                                  | 2                     | 0                   | 1                  | 0                |
| BB0774 | Chromosome       | PF78               | F                 | BB0774 flagellar basal-body rod protein (flgG) {Salmonella choleraesuis}                  | 1                     | 0.5                 | 2                  | 0.5              |

| Gene*   | Genetic element* | Paralogous family* | Functional group* | Gene description*                                                                                        | Dexa-treated medulla† | Dexa-treated heart† | Competent medulla‡ | Competent heart‡ |
|---------|------------------|--------------------|-------------------|----------------------------------------------------------------------------------------------------------|-----------------------|---------------------|--------------------|------------------|
| BB0781  | Chromosome       | None               | CH                | BB0781 GTP-binding protein (obg) {Synechocystis PCC6803}                                                 | 3                     | 2                   | 3                  | 2                |
| BB0789  | Chromosome       | None               | D                 | BB0789 cell division protein (ftsH) {Bacillus subtilis}                                                  | 3                     | 2                   | 3                  | 2                |
| BB0827  | Chromosome       | None               | R                 | BB0827 ATP-dependent helicase (hrpA) {Escherichia coli}                                                  | 3                     | 2                   | 2                  | 0                |
| BB0828  | Chromosome       | None               | R                 | BB0828 DNA topoisomerase I (topA) {Synechocystis PCC6803}                                                | 3                     | 2                   | 2                  | 0                |
| BB0829  | Chromosome       | None               | R                 | BB0829 exonuclease SbcD (sbcD) {Escherichia coli}                                                        | 3                     | 2                   | 3                  | 2                |
| BB0832  | Chromosome       | None               | U                 | BB0832 hypothetical protein                                                                              | 3                     | 1                   | 1                  | 0                |
| BB0834  | Chromosome       | PF23               | PD                | BB0834 ATP-dependent Clp protease, subunit C (clpC) {Porphyra purpurea}                                  | 3                     | 0.5                 | 2                  | 0.5              |
| BBA01   | lp54             | PF48               | HX                | BBA01 conserved hypothetical protein {Borrelia burgdorferi}                                              | 1                     | 0                   | 0.5                | 0                |
| BBA04   | lp54             | PF44               | CE                | BBA04 antigen, S2 {Borrelia burgdorferi}                                                                 | 3                     | 2                   | 2                  | 1                |
| BBA15   | lp54             | PF53               | CE                | BBA15 outer surface protein A (ospA) {Borrelia burgdorferi}                                              | 1                     | 0.5                 | 1                  | 0.5              |
| BBA16   | lp54             | PF53               | CE                | BBA16 outer surface protein B (ospB) {Borrelia burgdorferi}                                              | 3                     | 0                   | 2                  | 0                |
| BBA33   | lp54             | None               | U                 | BBA33 hypothetical protein                                                                               | 1                     | 2                   | 0.5                | 2                |
| BBA57   | lp54             | None               | HX                | BBA57 hypothetical protein                                                                               | 1                     | 2                   | 1                  | 2                |
| BBB07   | cp26             | None               | CE                | BBB07 outer surface protein, putative {Borrelia burgdorferi}                                             | 3                     | 0.5                 | 1                  | 0.5              |
| BBB16   | cp26             | PF37               | TP                | BBB16 oligopeptide ABC transporter, periplasmic oligopeptide-binding protein (oppAIV) {Escherichia coli} | 2                     | 1                   | 1                  | 0.5              |
| BBB19   | cp26             | None               | CE                | BBB19 outer surface protein C (ospC)                                                                     | 3                     | 2                   | 3                  | 2                |
| BBC11   | cp9              | PF96               | HX                | BBC11 conserved hypothetical protein {Borrelia burgdorferi}                                              | 1                     | 0                   | 1                  | 0                |
| BBE08   | lp25             | None               | U                 | BBE08 hypothetical protein                                                                               | 2                     | 0                   | 1                  | 0                |
| BBG03   | lp28-2           | PF48               | HX                | BBG03 conserved hypothetical protein, authentic frameshift {Borrelia burgdorferi}                        | 3                     | 2                   | 2                  | 1                |
| BBG10   | lp28-2           | PF101              | U                 | BBG10 hypothetical protein                                                                               | 1                     | 0.5                 | 0.5                | 0                |
| BBG17   | lp28-2           | None               | U                 | BBG17 hypothetical protein                                                                               | 1                     | 0.5                 | 1                  | 0.5              |
| BBG25   | lp28-2           | PF143              | HX                | BBG25 conserved hypothetical protein {Borrelia burgdorferi}                                              | 3                     | 1                   | 2                  | 1                |
| BBG27   | lp28-2           | None               | HX                | BBG27 conserved hypothetical protein {Borrelia burgdorferi}                                              | 3                     | 2                   | 3                  | 2                |
| BBH15   | lp28-3           | None               | U                 | BBH15 hypothetical protein                                                                               | 2                     | 1                   | 2                  | 1                |
| BBI16   | lp28-4           | PF60               | U                 | BBI16 hypothetical protein                                                                               | 1                     | 0.5                 | 1                  | 0.5              |
| BBJ02.1 | lp38             | PF48               | HX                | BBJ02.1 conserved hypothetical protein, pseudogene {Borrelia burgdorferi}                                | 1                     | 0                   | 1                  | 0                |
| BBK49   | lp36             | PF69               | U                 | BBK49 hypothetical protein                                                                               | 3                     | 1                   | 2                  | 0                |
| BBK52   | lp36             | PF44               | CE                | BBK52 protein p23 {Borrelia burgdorferi}                                                                 | 1                     | 0.5                 | 1                  | 0.5              |
| BBL03   | cp32-8           | PF148              | U                 | BBL03 hypothetical protein                                                                               | 1                     | 0                   | 1                  | 0                |

| Gene* | Genetic element* | Paralogous family* | Functional group* | Gene description*                                                                                | Dexa-treated medulla† | Dexa-treated heart† | Competent medulla‡ | Competent heart‡ |
|-------|------------------|--------------------|-------------------|--------------------------------------------------------------------------------------------------|-----------------------|---------------------|--------------------|------------------|
| BBL07 | cp32-8           | PF150              | HX                | BBL07 conserved hypothetical protein { Borrelia burgdorferi }                                    | 1                     | 0                   | 1                  | 0                |
| BBL34 | cp32-8           | PF49               | HX                | BBL34 conserved hypothetical protein { Borrelia burgdorferi }                                    | 1                     | 0                   | 1                  | 0                |
| BBM12 | cp32-6           | PF153              | U                 | BBM12 hypothetical protein                                                                       | 3                     | 1                   | 2                  | 0                |
| BBN20 | cp32-9           | PF140              | HX                | BBN20 conserved hypothetical protein { Borrelia burgdorferi }                                    | 2                     | 0.5                 | 2                  | 0.5              |
| BBN21 | cp32-9           | PF141              | U                 | BBN21 hypothetical protein, paralogous family 141, authentic frameshift { Borrelia burgdorferi } | 2                     | 0.5                 | 1                  | 0                |
| BBN26 | cp32-9           | PF143              | HX                | BBN26 outer surface protein, putative { Borrelia burgdorferi }                                   | 0.5                   | 0                   | 0.5                | 0                |
| BBO07 | cp32-7           | PF150              | HX                | BBO07 conserved hypothetical protein { Borrelia burgdorferi }                                    | 3                     | 1                   | 2                  | 0.5              |
| BBP07 | cp32-1           | PF150              | HX                | BBP07 conserved hypothetical protein { Borrelia burgdorferi }                                    | 3                     | 2                   | 0.5                | 0                |
| BBP15 | cp32-1           | PF156              | U                 | BBP15 hypothetical protein                                                                       | 1                     | 0                   | 0.5                | 0                |
| BBP17 | cp32-1           | PF159              | U                 | BBP17 hypothetical protein                                                                       | 1                     | 0                   | 1                  | 0                |
| BBP22 | cp32-1           | PF142              | HX                | BBP22 conserved hypothetical protein { Borrelia burgdorferi }                                    | 1                     | 0.5                 | 1                  | 0                |
| BBQ52 | lp56             | PF147              | U                 | BBQ52 hypothetical protein                                                                       | 2                     | 0.5                 | 1                  | 0                |
| BBR13 | cp32-4           | PF154              | U                 | BBR13 hypothetical protein                                                                       | 3                     | 2                   | 1                  | 0.5              |
| BBR14 | cp32-4           | PF155              | U                 | BBR14 hypothetical protein                                                                       | 1                     | 0                   | 1                  | 0                |
| BBR15 | cp32-4           | PF156              | U                 | BBR15 hypothetical protein                                                                       | 3                     | 0.5                 | 3                  | 0.5              |
| BBR17 | cp32-4           | PF159              | U                 | BBR17 hypothetical protein                                                                       | 2                     | 0.5                 | 1                  | 0                |
| BBR21 | cp32-4           | PF141              | HX                | BBR21 conserved hypothetical protein { Borrelia burgdorferi }                                    | 2                     | 0                   | 1                  | 0                |
| BBR22 | cp32-4           | PF142              | HX                | BBR22 conserved hypothetical protein { Borrelia burgdorferi }                                    | 2                     | 0.5                 | 1                  | 0                |
| BBR27 | cp32-4           | PF80               | HX                | BBR27 conserved hypothetical protein { Borrelia burgdorferi }                                    | 0.5                   | 0                   | 0.5                | 0                |
| BBS04 | cp32-3           | PF148              | U                 | BBS04 hypothetical protein                                                                       | 2                     | 1                   | 1                  | 0                |
| BBS07 | cp32-3           | PF150              | HX                | BBS07 conserved hypothetical protein { Borrelia burgdorferi }                                    | 1                     | 0.5                 | 1                  | 0.5              |
| BBS12 | cp32-3           | PF153              | U                 | BBS12 hypothetical protein                                                                       | 2                     | 0.5                 | 0.5                | 0                |

\*All designations used are according to *B. burgdorferi* genome database (<http://www.tigr.org/tigr-scripts/CMR2/GenomePage3.spl?database=gbb>)

†DECAL performed on medulla and heart tissue samples taken from dexamethosone-treated NHPs.

‡DECAL performed on medulla and heart tissue samples taken from immunocompetent NHPs. The functional categories are: ARS, amino acid biosynthesis; B, biosynthesis; CE, cell envelope; CH, chemotaxis proteins, D, cell division; F, flagellar biosynthesis; FM, fatty acid metabolism; GM, general metabolism; HE, hemolysins; HS, heat shock proteins; HX, conserved hypothetical proteins; IM, intermediary metabolism; NM, nucleotide metabolism; PD, protein degradation; PE, protein export; R, replication; RP, ribosomal proteins; TF, translation factors; TP, transport proteins; TR, transcription; U, hypothetical proteins; X, other.
