# Supplementary material
Source: PubMed Central journal article supplement (PMC307674)
Supplement: pnas_100_26_15953__7.pdf [file pnas_100_26_15953__7.pdf]

**Table 4. List of genes showing expression profiles that contrast between steroid -treated and untreated *B. burgdorferi* infected NHPs**

| Gene * | Genetic element* | Paralogous family* | Functional group* | Description*                                                                             | Dexa-treated medulla† | Dexa-treated heart† | Competent medulla‡ | Competent Heart‡ |
|--------|------------------|--------------------|-------------------|------------------------------------------------------------------------------------------|-----------------------|---------------------|--------------------|------------------|
| BB0011 | Chromosome       | None               | U                 | BB0011 hypothetical protein                                                              | 3                     | 3                   | 3                  | 1                |
| BB0023 | Chromosome       | None               | R                 | BB0023 Holliday junction DNA helicase (ruvA) { <i>Borrelia burgdorferi</i> }             | 3                     | 3                   | 3                  | 1                |
| BB0057 | Chromosome       | None               | IM                | BB0057 glyceraldehyde 3-phosphate dehydrogenase (gap) { <i>Borrelia burgdorferi</i> }    | 2                     | 2                   | 2                  | 0.5              |
| BB0071 | Chromosome       | None               | U                 | BB0071 hypothetical protein                                                              | 2                     | 0.5                 | 0.5                | 0.5              |
| BB0088 | Chromosome       | PF11               | TF                | BB0088 GTP-binding membrane protein (lepA) { <i>Haemophilus influenzae</i> }             | 3                     | 3                   | 2                  | 0.5              |
| BB0098 | Chromosome       | PF118              | R                 | BB0098 DNA mismatch repair protein, putative { <i>Synechocystis</i> PCC6803}             | 2                     | 0.5                 | 0                  | 0                |
| BB0154 | Chromosome       | None               | PE                | BB0154 preprotein translocase subunit (secA) { <i>Borrelia burgdorferi</i> }             | 2                     | 2                   | 3                  | 2                |
| BB0182 | Chromosome       | PF120              | F                 | BB0182 flagellar hook-associated protein 3 (flgL) { <i>Borrelia burgdorferi</i> }        | 3                     | 2                   | 3                  | 3                |
| BB0240 | Chromosome       | None               | TP                | BB0240 glycerol uptake facilitator (glpF) { <i>Bacillus subtilis</i> }                   | 2                     | 2                   | 2                  | 0.5              |
| BB0241 | Chromosome       | None               | IM                | BB0241 glycerol kinase (glpK) { <i>Escherichia coli</i> }                                | 3                     | 3                   | 3                  | 2                |
| BB0254 | Chromosome       | None               | R                 | BB0254 single-stranded-DNA-specific exonuclease (recJ) { <i>Haemophilus influenzae</i> } | 1                     | 1                   | 0                  | 0                |
| BB0271 | Chromosome       | None               | F                 | BB0271 flagellar biosynthesis protein (flhA) { <i>Borrelia burgdorferi</i> }             | 3                     | 3                   | 3                  | 1                |
| BB0289 | Chromosome       | None               | F                 | BB0289 flagellar assembly protein (fliH) { <i>Borrelia burgdorferi</i> }                 | 2                     | 2                   | 1                  | 0.5              |
| BB0341 | Chromosome       | None               | ARS               | BB0341 Glu-tRNA(Gln) amidotransferase, subunit B (gatB) { <i>Bacillus subtilis</i> }     | 3                     | 3                   | 2                  | 0.5              |
| BB0342 | Chromosome       | None               | ARS               | BB0342 Glu-tRNA(Gln) amidotransferase, subunit A (gatA) { <i>Bacillus subtilis</i> }     | 3                     | 3                   | 3                  | 1                |
| BB0349 | Chromosome       | None               | U                 | BB0349 hypothetical protein                                                              | 2                     | 2                   | 2                  | 0.5              |
| BB0352 | Chromosome       | None               | U                 | BB0352 hypothetical protein                                                              | 1                     | 1                   | 0                  | 0                |
| BB0357 | Chromosome       | None               | U                 | BB0357 hypothetical protein                                                              | 2                     | 2                   | 2                  | 0                |
| BB0359 | Chromosome       | None               | PD                | BB0359 carboxyl-terminal protease (ctp) { <i>Synechocystis</i> PCC6803}                  | 1                     | 1                   | 0                  | 0                |
| BB0364 | Chromosome       | None               | HX                | BB0364 conserved hypothetical protein { <i>Bacillus subtilis</i> }                       | 1                     | 1                   | 1                  | 0                |
| BB0366 | Chromosome       | PF131              | PD                | BB0366 aminopeptidase I (yscI) { <i>Borrelia burgdorferi</i> }                           | 2                     | 2                   | 2                  | 0                |
| BB0376 | Chromosome       | None               | IM                | BB0376 S-adenosylmethionine synthetase (metK) { <i>Bacillus subtilis</i> }               | 0.5                   | 1                   | 0.5                | 0.5              |
| BB0380 | Chromosome       | None               | TP                | BB0380 Mg <sup>2+</sup> transport protein (mgtE) { <i>Borrelia burgdorferi</i> }         | 3                     | 3                   | 3                  | 2                |
| BB0386 | Chromosome       | None               | RP                | BB0386 ribosomal protein S7 (rpsG) { <i>Salmonella choleraesuis</i> }                    | 3                     | 3                   | 3                  | 1                |
| BB0387 | Chromosome       | None               | B                 | BB0387 ribosome protein S12                                                              | 1                     | 2                   | 0                  | 0                |
| BB0392 | Chromosome       | None               | RP                | BB0392 ribosomal protein L1 (rplA) { <i>Bacillus stearothermophilus</i> }                | 3                     | 3                   | 0.5                | 0                |
| BB0403 | Chromosome       | None               | U                 | BB0403 hypothetical protein                                                              | 3                     | 3                   | 2                  | 1                |
| BB0442 | Chromosome       | None               | CE                | BB0442 inner membrane protein { <i>Haemophilus influenzae</i> }                          | 3                     | 0.5                 | 0                  | 0                |

| Gene * | Genetic element* | Paralogous family* | Functional group* | Description*                                                                                         | Dexa-treated medulla† | Dexa-treated heart† | Competent medulla‡ | Competent‡ Heart |
|--------|------------------|--------------------|-------------------|------------------------------------------------------------------------------------------------------|-----------------------|---------------------|--------------------|------------------|
| BB0444 | Chromosome       | None               | IM                | BB0444 nucleotide sugar epimerase { <i>Vibrio cholerae</i> }                                         | 2                     | 2                   | 2                  | 0.5              |
| BB0457 | Chromosome       | None               | R                 | BB0457 excinuclease ABC, subunit C (uvrC) { <i>Synechocystis</i> PCC6803 }                           | 2                     | 0.5                 | 0.5                | 0.5              |
| BB0472 | Chromosome       | None               | CE                | BB0472 UDP-N-acetylglucosamine 1-carboxyvinyltransferase (murA) { <i>Enterobacter cloacae</i> }      | 2                     | 2                   | 2                  | 0                |
| BB0492 | Chromosome       | None               | RP                | BB0492 ribosomal protein S8 (rpsH) { <i>Synechocystis</i> PCC6803 }                                  | 3                     | 3                   | 2                  | 0.5              |
| BB0502 | Chromosome       | None               | TR                | BB0502 DNA-directed RNA polymerase (rpoA) { <i>Bacillus subtilis</i> }                               | 2                     | 1                   | 1                  | 1                |
| BB0506 | Chromosome       | None               | HE                | BB0506 hemolysin (tlyA) { <i>Serpulina hyodysenteriae</i> }                                          | 3                     | 3                   | 0                  | 0                |
| BB0567 | Chromosome       | PF134              | CH                | BB0567 chemotaxis histidine kinase (cheA-1) { <i>Borrelia burgdorferi</i> }                          | 1                     | 1                   | 1                  | 0                |
| BB0603 | Chromosome       | None               | CE                | BB0603 membrane-associated protein p66 { <i>Borrelia burgdorferi</i> }                               | 2                     | 2                   | 2                  | 1                |
| BB0605 | Chromosome       | None               | CE                | BB0605 serine-type D-Ala-D-Ala carboxypeptidase (dacA) { <i>Haemophilus influenzae</i> }             | 3                     | 3                   | 2                  | 0.5              |
| BB0607 | Chromosome       | PF18               | R                 | BB0607 rep helicase, single-stranded DNA-dependent ATPase (rep) { <i>Haemophilus influenzae</i> }    | 0                     | 0                   | 0.5                | 0.5              |
| BB0615 | Chromosome       | None               | RP                | BB0615 ribosomal protein S4 (rpsD) { <i>Haemophilus influenzae</i> }                                 | 3                     | 3                   | 3                  | 2                |
| BB0620 | Chromosome       | PF21               | IM                | BB0620 beta-glucosidase, putative { <i>Synechocystis</i> PCC6803 }                                   | 3                     | 3                   | 3                  | 0.5              |
| BB0629 | Chromosome       | None               | TP                | BB0629 PTS system, fructose-specific IIABC component (fruA-2) { <i>Escherichia coli</i> }            | 2                     | 2                   | 0.5                | 0                |
| BB0634 | Chromosome       | None               | R                 | BB0634 exodeoxyribonuclease V, gamma chain (recC) { <i>Haemophilus influenzae</i> }                  | 3                     | 3                   | 3                  | 2                |
| BB0650 | Chromosome       | None               | U                 | BB0650 hypothetical protein                                                                          | 2                     | 2                   | 2                  | 0.5              |
| BB0651 | Chromosome       | None               | HX                | BB0651 conserved hypothetical protein { <i>Haemophilus influenzae</i> }                              | 2                     | 0.5                 | 0.5                | 0.5              |
| BB0652 | Chromosome       | PF136              | PE                | BB0652 protein-export membrane protein (secD) { <i>Escherichia coli</i> }                            | 3                     | 3                   | 3                  | 2                |
| BB0653 | Chromosome       | PF136              | PE                | BB0653 protein-export membrane protein (secF) { <i>Haemophilus influenzae</i> }                      | 2                     | 2                   | 2                  | 0.5              |
| BB0661 | Chromosome       | None               | U                 | BB0661 hypothetical protein                                                                          | 2                     | 2                   | 3                  | 0.5              |
| BB0662 | Chromosome       | None               | U                 | BB0662 hypothetical protein                                                                          | 2                     | 2                   | 2                  | 0.5              |
| BB0665 | Chromosome       | None               | U                 | BB0665 Hypothetical protein                                                                          | 2                     | 2                   | 0.5                | 0                |
| BB0669 | Chromosome       | PF134              | CH                | BB0669 chemotaxis histidine kinase (cheA-2) { <i>Borrelia burgdorferi</i> }                          | 3                     | 3                   | 3                  | 1                |
| BB0674 | Chromosome       | None               | U                 | BB0674 hypothetical protein                                                                          | 2                     | 2                   | 2                  | 0.5              |
| BB0677 | Chromosome       | PF4                | TP                | BB0677 ribose/galactose ABC transporter, ATP-binding protein (mglA) { <i>Mycoplasma genitalium</i> } | 2                     | 2                   | 2                  | 0.5              |
| BB0681 | Chromosome       | PF13               | CH                | BB0681 methyl-accepting chemotaxis protein (mcp-5) { <i>Escherichia coli</i> }                       | 3                     | 3                   | 3                  | 2                |
| BB0690 | Chromosome       | None               | X                 | BB0690 neutrophil activating protein (napA) { <i>Haemophilus influenzae</i> }                        | 3                     | 3                   | 1                  | 0.5              |
| BB0696 | Chromosome       | None               | HX                | BB0696 conserved hypothetical protein { <i>Mycobacterium tuberculosis</i> }                          | 1                     | 1                   | 2                  | 1                |
| BB0697 | Chromosome       | None               | HX                | BB0697 conserved hypothetical protein { <i>Haemophilus influenzae</i> }                              | 3                     | 3                   | 1                  | 0                |
| BB0714 | Chromosome       | None               | U                 | BB0714 hypothetical protein                                                                          | 3                     | 0.5                 | 0.5                | 0.5              |

| Gene * | Genetic element* | Paralogous family* | Functional group* | Description*                                                                                            | Dexa-treated medulla† | Dexa-treated heart† | Competent medulla‡ | Competent‡ Heart |
|--------|------------------|--------------------|-------------------|---------------------------------------------------------------------------------------------------------|-----------------------|---------------------|--------------------|------------------|
| BB0715 | Chromosome       | PF9                | CE                | BB0715 rod shape-determining protein (mreB-1) {Escherichia coli}                                        | 1                     | 2                   | 2                  | 2                |
| BB0761 | Chromosome       | PF2                | HX                | BB0761 conserved hypothetical protein {Synechocystis PCC6803}                                           | 2                     | 2                   | 0.5                | 0                |
| BB0785 | Chromosome       | None               | X                 | BB0785 stage V sporulation protein G {Bacillus megaterium}                                              | 0                     | 0                   | 1                  | 0                |
| BB0807 | Chromosome       | None               | U                 | BB0806 hypothetical protein                                                                             | 3                     | 3                   | 3                  | 2                |
| BB0821 | Chromosome       | None               | ARS               | BB0821 2-methylthio-N6-isopentyladenosine tRNA modification enzyme (miaA) {Escherichia coli}            | 3                     | 3                   | 3                  | 0.5              |
| BB0836 | Chromosome       | None               | R                 | BB0836 excinuclease ABC, subunit B (uvrB) {Escherichia coli}                                            | 3                     | 3                   | 3                  | 0.5              |
| BB0837 | Chromosome       | None               | R                 | BB0837 excinuclease ABC, subunit A (uvrA) {Escherichia coli}                                            | 3                     | 3                   | 3                  | 2                |
| BBA07  | lp54             | None               | GM                | BBA07 chpAI protein, putative {Escherichia coli}                                                        | 3                     | 3                   | 2                  | 0                |
| BBA18  | lp54             | PF57               | HX                | BBA18 conserved hypothetical protein {Borrelia burgdorferi}                                             | 2                     | 2                   | 2                  | 0.5              |
| BBA34  | lp54             | PF37               | TP                | BBA34 oligopeptide ABC transporter, periplasmic oligopeptide-binding protein (oppAV) {Escherichia coli} | 3                     | 3                   | 0.5                | 0                |
| BBA50  | lp54             | None               | U                 | BBA50 hypothetical protein                                                                              | 1                     | 1                   | 1                  | 0.5              |
| BBA59  | lp54             | None               | CE                | BBA59 lipoprotein {Borrelia burgdorferi}                                                                | 1                     | 2                   | 1                  | 1                |
| BBA65  | lp54             | PF54               | U                 | BBA65 hypothetical protein                                                                              | 1                     | 1                   | 0                  | 0                |
| BBA66  | lp54             | PF54               | CE                | BBA66 antigen, P35, putative {Borrelia burgdorferi}                                                     | 1                     | 2                   | 1                  | 1                |
| BBA74  | lp54             | PF171              | CE                | BBA74 outer membrane porin (oms28) {Borrelia burgdorferi}                                               | 3                     | 3                   | 3                  | 1                |
| BBB01  | cp26             | None               | HX                | BBB01 conserved hypothetical protein {Escherichia coli}                                                 | 3                     | 1                   | 1                  | 1                |
| BBB29  | cp26             | PF16               | TP                | BBB29 PTS system, maltose and glucose-specific IIABC component (malX) {Escherichia coli}                | 3                     | 3                   | 3                  | 1                |
| BBF10  | lp28-1           | None               | U                 | BBF10 hypothetical protein                                                                              | 1                     | 1                   | 0                  | 0                |
| BBG04  | lp28-2           | None               | U                 | BBG04 hypothetical protein                                                                              | 3                     | 3                   | 2                  | 1                |
| BBG05  | lp28-2           | PF82               | X                 | BBG05 transposase-like protein, authentic frameshift {Borrelia burgdorferi}                             | 2                     | 2                   | 0                  | 0                |
| BBG11  | lp28-2           | None               | U                 | BBG11 hypothetical protein                                                                              | 3                     | 3                   | 3                  | 1                |
| BBG24  | lp28-2           | PF104              | U                 | BBG24 hypothetical protein                                                                              | 3                     | 3                   | 2                  | 0.5              |
| BBG26  | lp28-2           | None               | U                 | BBG26 hypothetical protein                                                                              | 3                     | 3                   | 3                  | 1                |
| BBG29  | lp28-2           | PF62               | HX                | BBG29 conserved hypothetical protein {Borrelia burgdorferi}                                             | 2                     | 2                   | 2                  | 1                |
| BBH12  | lp28-3           | None               | U                 | BBH12 hypothetical protein                                                                              | 2                     | 2                   | 2                  | 1                |
| BBH14  | lp28-3           | None               | U                 | BBH14 hypothetical protein                                                                              | 2                     | 2                   | 2                  | 1                |
| BBH40  | lp28-3           | PF82               | X                 | BBH40 transposase-like protein, putative {Borrelia burgdorferi}                                         | 1                     | 1                   | 1                  | 0.5              |
| BBI04  | lp28-4           | None               | U                 | BBI04 hypothetical protein                                                                              | 3                     | 3                   | 3                  | 2                |
| BBI05  | lp28-4           | None               | U                 | BBI05 hypothetical protein                                                                              | 3                     | 3                   | 2                  | 1                |

| Gene * | Genetic element* | Paralogous family* | Functional group* | Description*                                                               | Dexa-treated medulla† | Dexa-treated heart† | Competent medulla‡ | Competent‡ Heart |
|--------|------------------|--------------------|-------------------|----------------------------------------------------------------------------|-----------------------|---------------------|--------------------|------------------|
| BBI12  | lp28-4           | None               | U                 | BBI12 hypothetical protein                                                 | 1                     | 1                   | 0.5                | 0                |
| BBI15  | lp28-4           | PF60               | U                 | BBI15 hypothetical protein                                                 | 2                     | 2                   | 2                  | 0.5              |
| BBI17  | lp28-4           | None               | U                 | BBI17 hypothetical protein                                                 | 3                     | 3                   | 1                  | 0.5              |
| BBI31  | lp28-4           | PF48               | HX                | BBI31 conserved hypothetical protein {Borrelia burgdorferi}                | 3                     | 3                   | 3                  | 0                |
| BBJ28  | lp38             | None               | U                 | BBJ28 hypothetical protein                                                 | 1                     | 1                   | 0                  | 0                |
| BBJ34  | lp38             | None               | U                 | BBJ34 hypothetical protein                                                 | 3                     | 3                   | 3                  | 1                |
| BBJ35  | lp38             | None               | U                 | BBJ35 hypothetical protein                                                 | 3                     | 3                   | 1                  | 0                |
| BBJ36  | lp38             | PF92               | U                 | BBJ36 hypothetical protein                                                 | 1                     | 1                   | 1                  | 0                |
| BBJ37  | lp38             | None               | U                 | BBJ37 hypothetical protein                                                 | 2                     | 2                   | 0                  | 0                |
| BBJ43  | lp38             | PF90               | U                 | BBJ43 hypothetical protein                                                 | 3                     | 1                   | 0.5                | 0.5              |
| BBK21  | lp36             | PF32               | HX                | BBK21 plasmid partition protein, putative {Bacillus subtilis}              | 3                     | 3                   | 0.5                | 0                |
| BBK46  | lp36             | PF75               | CE                | BBK46 immunogenic protein P37, authentic frameshift {Borrelia burgdorferi} | 1                     | 1                   | 0                  | 0                |
| BBL05  | cp32-8           | PF148              | U                 | BBL05 hypothetical protein                                                 | 3                     | 3                   | 2                  | 0.5              |
| BBL06  | cp32-8           | PF149              | HX                | BBL06 conserved hypothetical protein {Borrelia burgdorferi}                | 2                     | 0.5                 | 0                  | 0                |
| BBL09  | cp32-8           | PF108              | HX                | BBL09 conserved hypothetical protein {Borrelia burgdorferi}                | 2                     | 2                   | 0                  | 0                |
| BBL12  | cp32-8           | PF153              | U                 | BBL12 hypothetical protein                                                 | 3                     | 3                   | 2                  | 0.5              |
| BBL21  | cp32-8           | PF141              | HX                | BBL21 conserved hypothetical protein {Borrelia burgdorferi}                | 2                     | 0.5                 | 0                  | 0                |
| BBL27  | cp32-8           | PF80               | HX                | BBL27 conserved hypothetical protein {Borrelia burgdorferi}                | 1                     | 1                   | 0                  | 0                |
| BBM08  | cp32-6           | PF107              | HX                | BBM08 conserved hypothetical protein {Borrelia burgdorferi}                | 3                     | 3                   | 0.5                | 0                |
| BBM13  | cp32-6           | PF154              | U                 | BBM13 hypothetical protein                                                 | 2                     | 2                   | 2                  | 0                |
| BBM21  | cp32-6           | PF141              | HX                | BBM21 conserved hypothetical protein {Borrelia burgdorferi}                | 2                     | 0                   | 0                  | 0                |
| BBM22  | cp32-6           | PF142              | HX                | BBM22 conserved hypothetical protein {Borrelia burgdorferi}                | 2                     | 0                   | 0                  | 0                |
| BBM35  | cp32-6           | PF165              | HX                | BBM35 conserved hypothetical protein {Borrelia burgdorferi}                | 3                     | 3                   | 2                  | 1                |
| BBM40  | cp32-6           | None               | U                 | BBM40 hypothetical protein                                                 | 2                     | 2                   | 2                  | 1                |
| BBN04  | cp32-9           | PF148              | U                 | BBN04 hypothetical protein                                                 | 1                     | 1                   | 0.5                | 0                |
| BBN05  | cp32-9           | PF148              | U                 | BBN05 hypothetical protein, paralogous family 148, authentic frameshift    | 1                     | 1                   | 0.5                | 0                |
| BBN07  | cp32-9           | PF150              | HX                | BBN07 conserved hypothetical protein {Borrelia burgdorferi}                | 3                     | 3                   | 2                  | 1                |
| BBN11  | cp32-9           | PF152              | U                 | BBN11 hypothetical protein                                                 | 2                     | 2                   | 2                  | 1                |
| BBN12  | cp32-9           | PF153              | U                 | BBN12 hypothetical protein                                                 | 2                     | 2                   | 2                  | 1                |

| Gene * | Genetic element* | Paralogous family* | Functional group* | Description*                                                                     | Dexa-treated medulla† | Dexa-treated heart† | Competent medulla‡ | Competent‡ Heart |
|--------|------------------|--------------------|-------------------|----------------------------------------------------------------------------------|-----------------------|---------------------|--------------------|------------------|
| BBN13  | cp32-9           | PF154              | U                 | BBN13 hypothetical protein, paralogous family 154, authentic frameshift          | 2                     | 2                   | 2                  | 1                |
| BBN15  | cp32-9           | PF156              | U                 | BBN15 hypothetical protein                                                       | 2                     | 2                   | 2                  | 1                |
| BBN35  | cp32-9           | PF165              | HX                | BBN35 conserved hypothetical protein {Borrelia burgdorferi}                      | 1                     | 1                   | 1                  | 0.5              |
| BBO02  | cp32-7           | PF147              | U                 | BBO02 hypothetical protein                                                       | 1                     | 1                   | 0.5                | 0                |
| BBO05  | cp32-7           | PF148              | U                 | BBO05 hypothetical protein                                                       | 3                     | 3                   | 2                  | 1                |
| BBO12  | cp32-7           | PF153              | U                 | BBO12 hypothetical protein                                                       | 3                     | 3                   | 2                  | 1                |
| BBO13  | cp32-7           | PF154              | U                 | BBO13 hypothetical protein                                                       | 1                     | 1                   | 2                  | 0.5              |
| BBO14  | cp32-7           | PF155              | U                 | BBO14 hypothetical protein                                                       | 3                     | 3                   | 1                  | 0.5              |
| BBO16  | cp32-7           | PF157              | U                 | BBO16 hypothetical protein                                                       | 2                     | 2                   | 0.5                | 0                |
| BBO17  | cp32-7           | PF159              | U                 | BBO17 hypothetical protein                                                       | 3                     | 3                   | 2                  | 0.5              |
| BBO18  | cp32-7           | PF160              | U                 | BBO18 hypothetical protein                                                       | 3                     | 3                   | 2                  | 1                |
| BBO21  | cp32-7           | PF141              | HX                | BBO21 conserved hypothetical protein {Borrelia burgdorferi}                      | 2                     | 2                   | 0.5                | 0                |
| BBO29  | cp32-7           | PF161              | U                 | BBO29 hypothetical protein                                                       | 1                     | 1                   | 0                  | 0                |
| BBO38  | cp32-7           | None               | HX                | BBO38 conserved hypothetical protein                                             | 3                     | 3                   | 0                  | 0                |
| BBP03  | cp32-1           | PF148              | U                 | BBP03 hypothetical protein                                                       | 1                     | 1                   | 1                  | 0                |
| BBP06  | cp32-1           | PF149              | HX                | BBP06 conserved hypothetical protein {Borrelia burgdorferi}                      | 1                     | 1                   | 0.5                | 0                |
| BBP08  | cp32-1           | PF107              | HX                | BBP08 conserved hypothetical protein {Borrelia burgdorferi}                      | 3                     | 2                   | 0                  | 0                |
| BBP12  | cp32-1           | PF153              | U                 | BBP12 hypothetical protein                                                       | 3                     | 3                   | 2                  | 0                |
| BBP13  | cp32-1           | PF154              | U                 | BBP13 hypothetical protein                                                       | 3                     | 3                   | 2                  | 1                |
| BBQ13  | lp56             | PF149              | HX                | BBQ13 conserved hypothetical protein {Borrelia burgdorferi}                      | 1                     | 1                   | 1                  | 0                |
| BBQ14  | lp56             | PF150              | HX                | BBQ14 conserved hypothetical protein {Borrelia burgdorferi}                      | 2                     | 2                   | 2                  | 0.5              |
| BBQ15  | lp56             | PF107              | HX                | BBQ15 conserved hypothetical protein {Borrelia burgdorferi}                      | 1                     | 1                   | 0                  | 0                |
| BBQ16  | lp56             | PF108              | U                 | BBQ16 hypothetical protein, paralogous family 108, authentic frameshift {REMOVE} | 3                     | 3                   | 0                  | 0                |
| BBQ17  | lp56             | PF151              | HX                | BBQ17 conserved hypothetical protein {Borrelia burgdorferi}                      | 2                     | 0                   | 0                  | 0                |
| BBQ19  | lp56             | PF153              | U                 | BBQ19 hypothetical protein                                                       | 2                     | 2                   | 2                  | 0.5              |
| BBQ20  | lp56             | PF154              | U                 | BBQ20 hypothetical protein                                                       | 2                     | 2                   | 1                  | 0                |
| BBQ22  | lp56             | PF156              | U                 | BBQ22 hypothetical protein                                                       | 2                     | 2                   | 1                  | 0.5              |
| BBQ24  | lp56             | PF159              | U                 | BBQ24 hypothetical protein                                                       | 1                     | 1                   | 0.5                | 0                |
| BBQ28  | lp56             | PF141              | HX                | BBQ28 conserved hypothetical protein {Borrelia burgdorferi}                      | 1                     | 1                   | 0                  | 0                |

| Gene * | Genetic element* | Paralogous family* | Functional group* | Description*                                                      | Dexa-treated medulla <sup>†</sup> | Dexa-treated heart <sup>†</sup> | Competent medulla <sup>‡</sup> | Competent <sup>‡</sup> Heart |
|--------|------------------|--------------------|-------------------|-------------------------------------------------------------------|-----------------------------------|---------------------------------|--------------------------------|------------------------------|
| BBQ29  | lp56             | PF142              | HX                | BBQ29 conserved hypothetical protein {Borrelia burgdorferi}       | 1                                 | 1                               | 1                              | 0.5                          |
| BBR03  | cp32-4           | PF148              | U                 | BBR03 hypothetical protein                                        | 2                                 | 2                               | 0                              | 0                            |
| BBR05  | cp32-4           | PF148              | U                 | BBR05 hypothetical protein                                        | 1                                 | 1                               | 1                              | 0                            |
| BBR06  | cp32-4           | PF149              | HX                | BBR06 conserved hypothetical protein {Borrelia burgdorferi}       | 1                                 | 1                               | 1                              | 0                            |
| BBR07  | cp32-4           | PF150              | HX                | BBR07 conserved hypothetical protein {Borrelia burgdorferi}       | 1                                 | 1                               | 1                              | 0.5                          |
| BBR11  | cp32-9           | PF152              | U                 | BBR11 hypothetical protein                                        | 3                                 | 3                               | 1                              | 0                            |
| BBR12  | cp32-4           | PF153              | U                 | BBR12 hypothetical protein                                        | 3                                 | 1                               | 1                              | 1                            |
| BBR19  | cp32-4           | PF139              | HX                | BBR19 conserved hypothetical protein {Borrelia burgdorferi}       | 2                                 | 2                               | 1                              | 0                            |
| BBR45  | cp32-4           | PF145              | HX                | BBR45 conserved hypothetical protein {Streptococcus thermophilus} | 1                                 | 1                               | 0.5                            | 0                            |
| BBS05  | cp32-3           | PF148              | U                 | BBS05 hypothetical protein                                        | 1                                 | 1                               | 1                              | 0.5                          |
| BBS06  | cp32-3           | PF149              | HX                | BBS06 conserved hypothetical protein {Borrelia burgdorferi}       | 1                                 | 1                               | 1                              | 0                            |
| BBS09  | cp32-3           | PF108              | HX                | BBS09 conserved hypothetical protein {Borrelia burgdorferi}       | 3                                 | 3                               | 0.5                            | 0                            |
| BBS11  | cp32-3           | PF152              | U                 | BBS11 hypothetical protein                                        | 2                                 | 2                               | 0.5                            | 0                            |
| BBS14  | cp32-3           | PF155              | U                 | BBS14 hypothetical protein                                        | 2                                 | 0                               | 0                              | 0                            |
| BBS15  | cp32-3           | PF156              | U                 | BBS15 hypothetical protein                                        | 3                                 | 3                               | 0.5                            | 0                            |
| BBS18  | cp32-3           | PF160              | U                 | BBS18 hypothetical protein                                        | 1                                 | 1                               | 1                              | 0                            |
| BBS19  | cp32-3           | PF139              | HX                | BBS19 conserved hypothetical protein {Borrelia burgdorferi}       | 1                                 | 0                               | 0                              | 0                            |
| BBS21  | cp32-1           | PF141              | HX                | BBS21 conserved hypothetical protein {Borrelia burgdorferi}       | 1                                 | 0.5                             | 0                              | 0                            |
| BBS34  | cp32-1           | PF50               | HX                | BBS34 conserved hypothetical protein {Borrelia burgdorferi}       | 1                                 | 0                               | 0                              | 0                            |
| BBS35  | cp32-1           | PF32               | HX                | BBS35 plasmid partition protein, putative {Bacillus subtilis}     | 1                                 | 0                               | 0                              | 0                            |
| BBS45  | cp32-3           | PF145              | HX                | BBS45 conserved hypothetical protein {Streptococcus thermophilus} | 3                                 | 2                               | 1                              | 1                            |

\*All designations used are according to *B. burgdorferi* genome database (<http://www.tigr.org/tigr-scripts/CMR2/GenomePage3.spl?database=gbb>)

<sup>†</sup>DECAL performed on medulla and heart tissue samples taken from dexamethosone-treated NHPs.

<sup>‡</sup>DECAL performed on medulla and heart tissue samples taken from immunocompetent NHPs. The functional categories are: ARS, amino acid biosynthesis; B, biosynthesis; CE, cell envelope;

CH, chemotaxis proteins, D, cell division; F, flagellar biosynthesis; FM, fatty acid metabolism; GM, general metabolism; HE, hemolysins; HS, heat shock proteins; HX, conserved hypothetical proteins;

IM, intermediary metabolism; NM, nucleotide metabolism; PD, protein degradation; PE, protein export; R, replication; RP, ribosomal proteins; TF, translation factors;

TP, transport proteins; TR, transcription; U, hypothetical proteins; X, other.
