# Supplementary material
Source: PubMed Central journal article supplement (PMC307674)

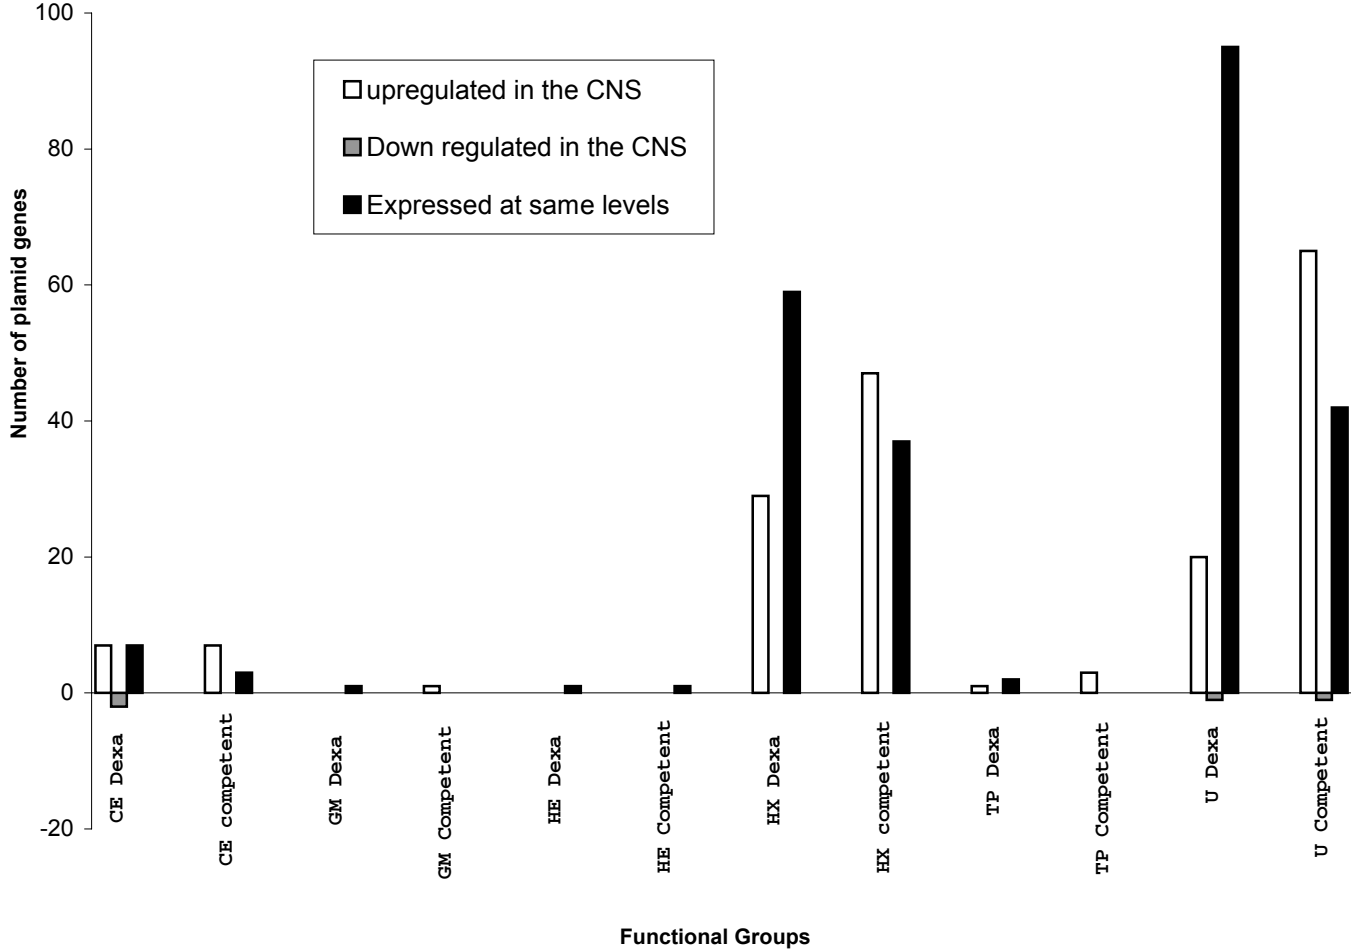

Supplement: pnas_100_26_15953__3.pdf [file pnas_100_26_15953__3.pdf]

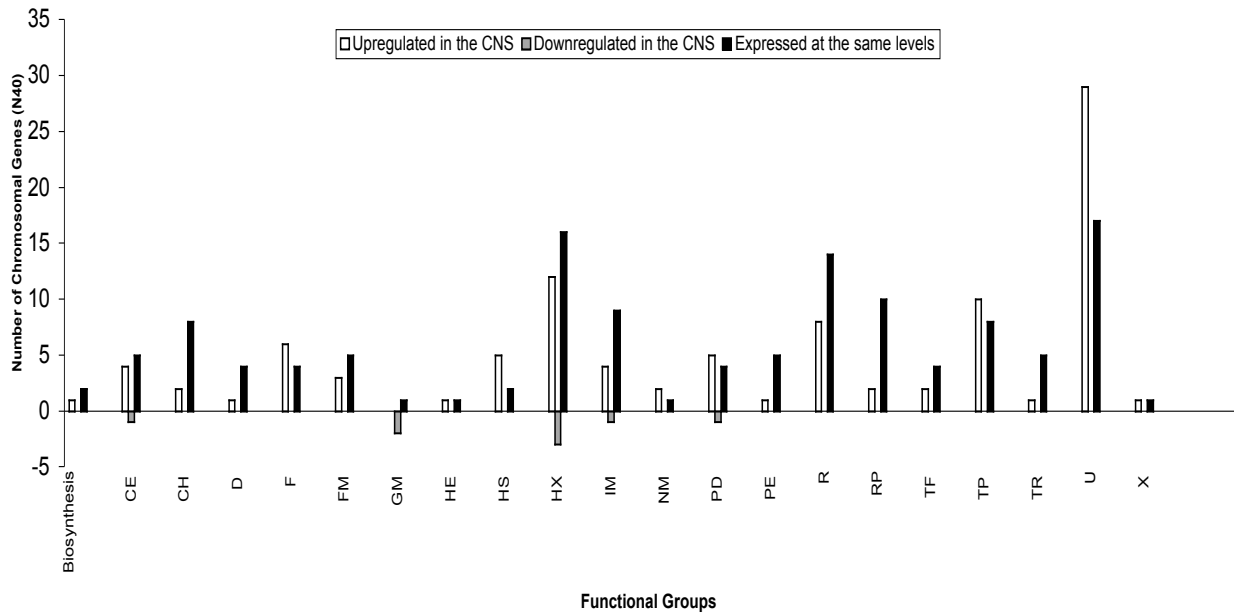

Supplement: pnas_100_26_15953__4.pdf [file pnas_100_26_15953__4.pdf]

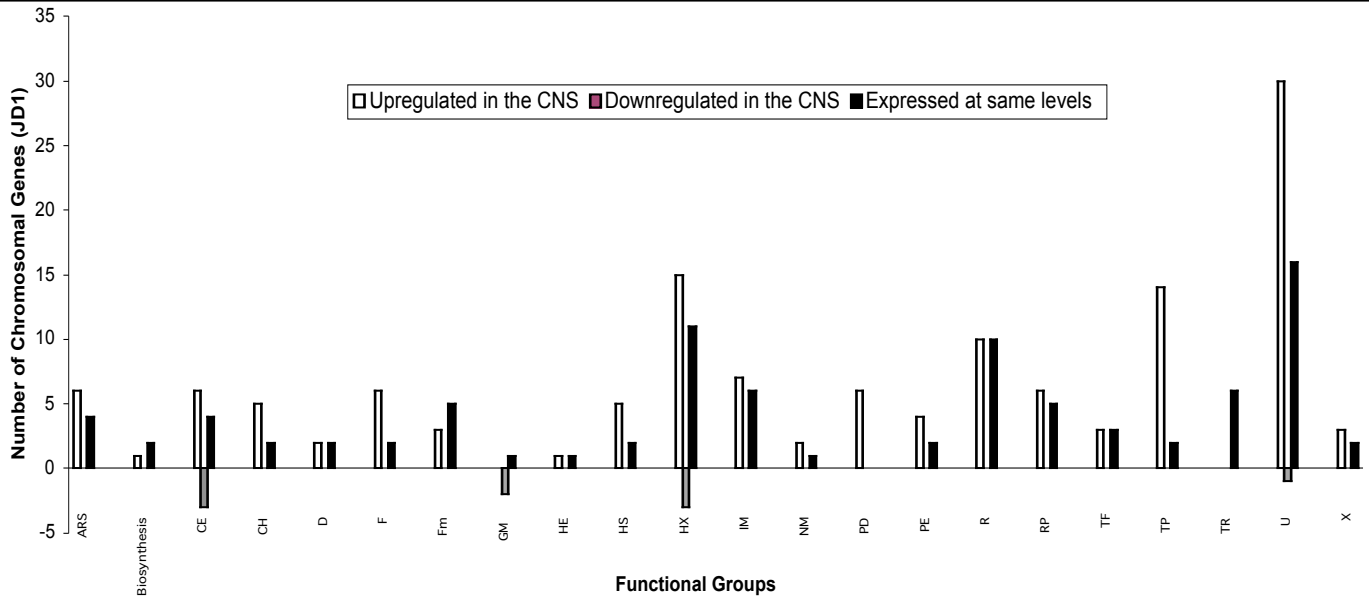

Supplement: pnas_100_26_15953__5.pdf [file pnas_100_26_15953__5.pdf]
